# Supplementary material for: Effects of Propolis and Phenolic Acids on Triple-Negative Breast Cancer Cell Lines: Potential Involvement of Epigenetic Mechanisms
Source: PubMed Central journal article supplement (PMC7143942; doi:10.3390/molecules25061289), 2020-03-12
Supplement: molecules-25-01289-s001.pdf [file molecules-25-01289-s001.pdf]

*Article*

# **Effects of Propolis and Phenolic Acids on Triple-Negative Breast Cancer Cell Lines: Potential Involvement of Epigenetic Mechanisms**

**João Henrique Maia Assumpção<sup>1</sup>, Agnes Alessandra Sekijima Takeda<sup>2</sup>, José Maurício Sforcin<sup>1</sup> and Cláudia Aparecida Rainho<sup>1,\*</sup>**

<sup>1</sup> Department of Chemical and Biological Sciences, Institute of Biosciences, São Paulo State University (UNESP), Botucatu, 18618-689, São Paulo, Brazil; joao.maia@unesp.br (J.H.M.A.); jose.m.sforcin@unesp.br (J.M.S.)

<sup>2</sup> Department of Biophysics and Pharmacology, Institute of Biosciences, São Paulo State University (UNESP), Botucatu, 18618-689, São Paulo, Brazil; agnes.takeda@unesp.br (A.A.S.T.)

\* Correspondence: claudia.rainho@unesp.br; Tel.: +55-014-3880-0368

Supplementary figure S1

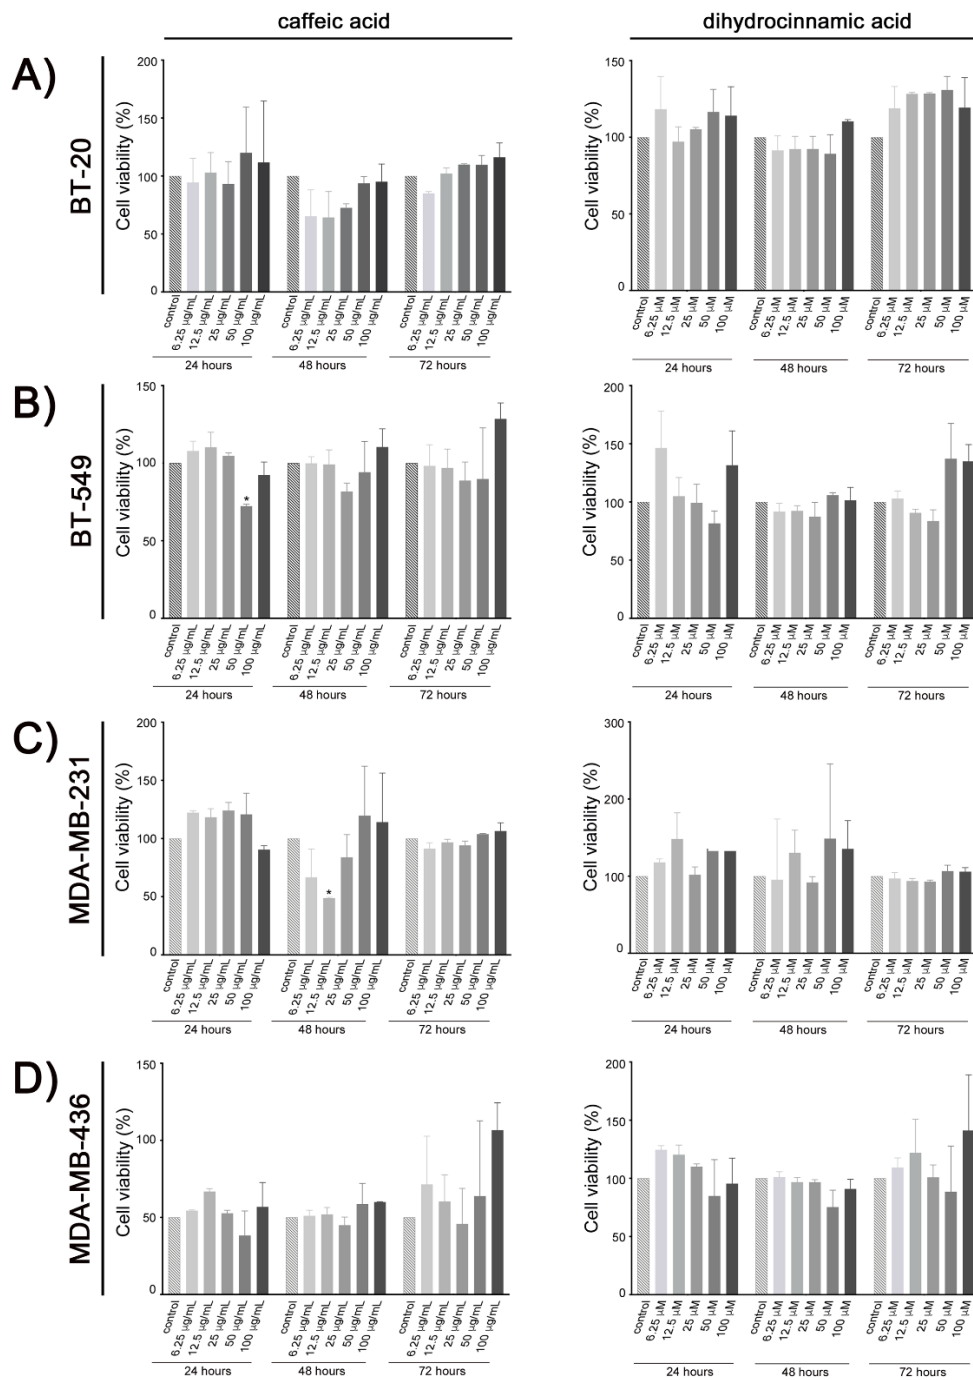

**Figure 1.** Cell viability analysis after in vitro treatment with caffeic and dihydrocinnamic acids of triple-negative breast cancer cell lines: BT-20 (A), BT-549 (B), MDA-MB-231 (C), MDA-MB-436 (D). Data represent means and standard deviation of three independent experiments. \*  $p < 0,05$  in comparison with the untreated controls in the respective period of exposure (24, 48 or 71 h).

Supplementary figure S2

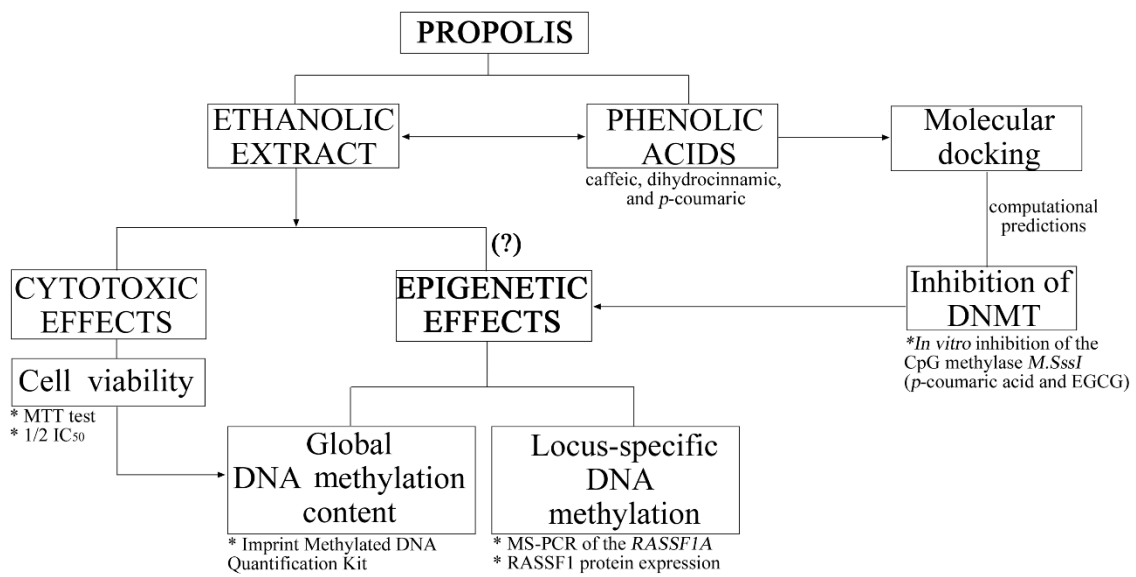

**Figure 2.** Study workflow. Three phenolic acids present in the EEP and four triple-negative breast cancer cell lines (BT-20, BT-549, MDA-MB-231, and MDA-MB-436) were selected for the present study. At first, the MTT test was used to evaluate the cell viability and determine the IC<sub>50</sub> after in vitro exposure to the EEP and phenolic acids. The putative global hypomethylating effect of EEP was evaluated after 96 h of exposure at a dose of ½ IC<sub>50</sub> in the four cell lines. In parallel, computational docking predictions investigate the potential of the phenolic acids to interact with the catalytic domain of DNMT1, using the co-crystallography of DNMT1-SAH as well as the docking of EGCG as references. The in vitro inhibition of the CpG methylase *M.SssI* was used to validate the docking predictions. Methylation-Specific Polymerase Chain Reaction (MS-PCR) was used to analyze if treatment with EEP, p-coumaric acid and EGCG could revert the aberrant DNA hypermethylation of BT-549 cells. The *RASSF1* locus was the target region selected for this analysis.
